# Supplementary material for: Complement Mediated Signaling on Pulmonary CD103+ Dendritic Cells Is Critical for Their Migratory Function in Response to Influenza Infection
Source: PubMed Central journal article supplement (PMC3542115; doi:10.1371/journal.ppat.1003115), 2013-01-10

Figure S4

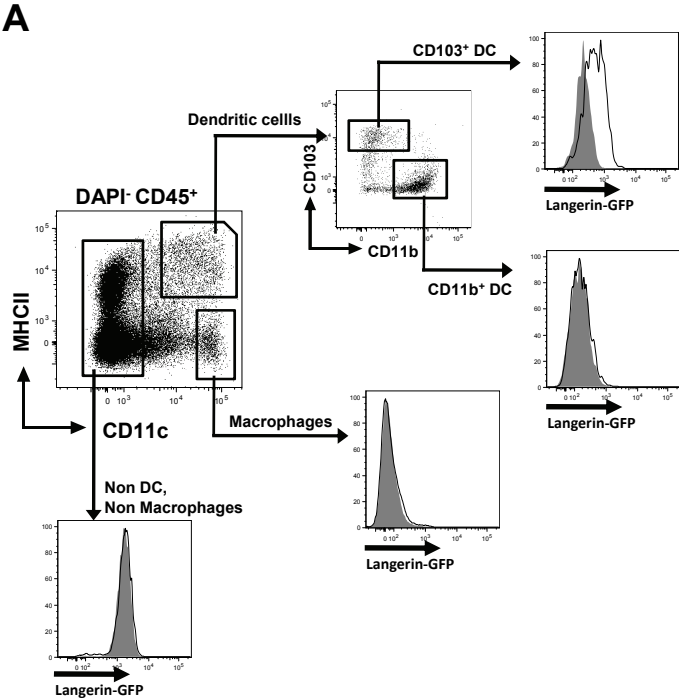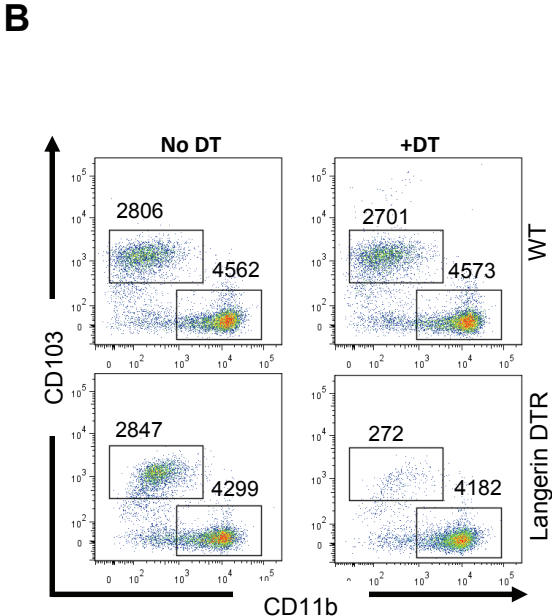

Supplement: ppat.1003115.s004.pdf [file ppat.1003115.s004.pdf]
